# Supplementary material for: Activity patterns of metal oxide catalysts in the synthesis of N-phenylpropionamide from propanoic acid and aniline
Source: Royal Society of Chemistry journal article supplement (doi:10.1039/c4cy01504e), 2014-12-17
Supplement: c4cy01504e1.pdf [file c4cy01504e1.pdf]

*Table S1. Assignment of IR bands in Figure 3*

| <i>Frequency, cm<sup>-1</sup></i>                                                                                                                                               | <i>Material</i>                                                   | <i>Assignment</i>                                                     | <i>Ref.</i> |
|---------------------------------------------------------------------------------------------------------------------------------------------------------------------------------|-------------------------------------------------------------------|-----------------------------------------------------------------------|-------------|
| <b>Bands resulting from C<sub>2</sub>H<sub>5</sub>COOH adsorption (spectra reported as blue lines)</b>                                                                          |                                                                   |                                                                       |             |
| 1550-1495                                                                                                                                                                       | TiO <sub>2</sub> _P25                                             |                                                                       |             |
| 1600, 1540                                                                                                                                                                      | ZrO <sub>2</sub>                                                  |                                                                       |             |
| 1556                                                                                                                                                                            | TiO <sub>2</sub> _Merck                                           | $\nu_{\text{asym}}\text{COO}^-$                                       | 26,27       |
| 1600-1500,                                                                                                                                                                      | CeO <sub>2</sub>                                                  |                                                                       |             |
| 1635, 1576                                                                                                                                                                      | Al <sub>2</sub> O <sub>3</sub>                                    |                                                                       |             |
| 1450-1400                                                                                                                                                                       | TiO <sub>2</sub> _P25                                             |                                                                       |             |
| 1440, 1418                                                                                                                                                                      | ZrO <sub>2</sub>                                                  |                                                                       |             |
| 1450-1400                                                                                                                                                                       | TiO <sub>2</sub> _Merck                                           | $\nu_{\text{sym}}\text{COO}^-$                                        | 26, 27      |
| 1425                                                                                                                                                                            | CeO <sub>2</sub>                                                  |                                                                       |             |
| 1450, 1418                                                                                                                                                                      | Al <sub>2</sub> O <sub>3</sub>                                    |                                                                       |             |
| 1473                                                                                                                                                                            | TiO <sub>2</sub> _P25, ZrO <sub>2</sub> , TiO <sub>2</sub> _Merck |                                                                       |             |
| 1468                                                                                                                                                                            | CeO <sub>2</sub> ,                                                | $\delta_{\text{asym}}\text{CH}_3 + \delta_{\text{sym}}\text{CH}_2$    | 28          |
| 1480                                                                                                                                                                            | Al <sub>2</sub> O <sub>3</sub>                                    |                                                                       |             |
| 1380                                                                                                                                                                            | all oxides                                                        | $\delta_{\text{sym}}\text{CH}_3$                                      | 28          |
| 1670                                                                                                                                                                            | TiO <sub>2</sub> _Merck, Al <sub>2</sub> O <sub>3</sub>           | $\nu\text{C=O}$ , undissociated<br>C <sub>2</sub> H <sub>5</sub> COOH | 26, 27      |
| <b>Bands resulting from subsequent adsorption of C<sub>2</sub>H<sub>5</sub>COOH + CH<sub>3</sub>(CH<sub>2</sub>)<sub>4</sub>NH<sub>2</sub> (spectra reported as grey lines)</b> |                                                                   |                                                                       |             |
| 1590                                                                                                                                                                            | TiO <sub>2</sub> _P25                                             | $\nu\text{C=O}$ (amide)                                               | 28          |
| 1530                                                                                                                                                                            | TiO <sub>2</sub> _P25                                             |                                                                       |             |
| 1600, 1540                                                                                                                                                                      | ZrO <sub>2</sub>                                                  |                                                                       |             |
| 1616, 1556                                                                                                                                                                      | TiO <sub>2</sub> _Merck                                           | $\nu_{\text{asym}}\text{COO}^-$                                       | 26, 27      |
| 1600-1500,                                                                                                                                                                      | CeO <sub>2</sub>                                                  |                                                                       |             |
| 1644, 1635, 1576                                                                                                                                                                | Al <sub>2</sub> O <sub>3</sub>                                    |                                                                       |             |
| 1415                                                                                                                                                                            | TiO <sub>2</sub> _P25                                             |                                                                       |             |
| 1440, 1418                                                                                                                                                                      | ZrO <sub>2</sub>                                                  |                                                                       |             |
| 1450-1400                                                                                                                                                                       | TiO <sub>2</sub> _Merck                                           | $\nu_{\text{sym}}\text{COO}^-$                                        | 26, 27      |
| 1425                                                                                                                                                                            | CeO <sub>2</sub>                                                  |                                                                       |             |
| 1450, 1418                                                                                                                                                                      | Al <sub>2</sub> O <sub>3</sub>                                    |                                                                       |             |
| 1560                                                                                                                                                                            | TiO <sub>2</sub> _Merck                                           |                                                                       |             |
| 1582                                                                                                                                                                            | Al <sub>2</sub> O <sub>3</sub>                                    | $\delta\text{NH}_2$                                                   | 28          |
| 1469                                                                                                                                                                            | TiO <sub>2</sub> _P25,                                            |                                                                       |             |
| 1474                                                                                                                                                                            | ZrO <sub>2</sub> ,                                                |                                                                       |             |
| 1470                                                                                                                                                                            | TiO <sub>2</sub> _Merck                                           | $\delta_{\text{asym}}\text{CH}_3 + \delta_{\text{sym}}\text{CH}_2$    | 28          |
| 1368                                                                                                                                                                            | CeO <sub>2</sub> ,                                                |                                                                       |             |
| 1471                                                                                                                                                                            | Al <sub>2</sub> O <sub>3</sub>                                    |                                                                       |             |
| 1380                                                                                                                                                                            | all oxides                                                        | $\delta_{\text{sym}}\text{CH}_3$                                      | 28          |

**Table S2.** Assignment of IR bands in Figure 4

| <i>Frequency, cm<sup>-1</sup></i>                                                                                                              | <i>Material</i>                                   | <i>Assignment</i>                                     | <i>Ref.</i> |
|------------------------------------------------------------------------------------------------------------------------------------------------|---------------------------------------------------|-------------------------------------------------------|-------------|
| <b>Bands resulting from HCOOH adsorption (spectra reported as blue lines)</b>                                                                  |                                                   |                                                       |             |
| 1580-1541                                                                                                                                      | TiO <sub>2</sub> _P25                             |                                                       |             |
| 1566                                                                                                                                           | ZrO <sub>2</sub>                                  |                                                       |             |
| 1598                                                                                                                                           | TiO <sub>2</sub> _Merck                           | $\nu_{\text{asym}}\text{COO}^-$                       | 18, 26, 27  |
| 1586, 1550,                                                                                                                                    | CeO <sub>2</sub>                                  |                                                       |             |
| 1628, 1600                                                                                                                                     | Al <sub>2</sub> O <sub>3</sub>                    |                                                       |             |
| 1412, 1361                                                                                                                                     | TiO <sub>2</sub> _P25                             |                                                       |             |
| 1370-1316                                                                                                                                      | ZrO <sub>2</sub>                                  |                                                       |             |
| 1403, 1364                                                                                                                                     | TiO <sub>2</sub> _Merck                           | $\nu_{\text{sym}}\text{COO}^-$                        | 18, 26, 27  |
| 1371, 1361, 1307                                                                                                                               | CeO <sub>2</sub>                                  |                                                       |             |
| 1391, 1324                                                                                                                                     | Al <sub>2</sub> O <sub>3</sub>                    |                                                       |             |
| 1385                                                                                                                                           | TiO <sub>2</sub> _P25, ZrO <sub>2</sub>           |                                                       |             |
| 1386                                                                                                                                           | TiO <sub>2</sub> _Merck                           | $\delta\text{O-C-H}$                                  | 18, 26, 27  |
| 1380                                                                                                                                           | CeO <sub>2</sub> , Al <sub>2</sub> O <sub>3</sub> |                                                       |             |
| 1673                                                                                                                                           | TiO <sub>2</sub> _Merck                           | $\nu\text{C=O}$ ,                                     |             |
| 1675                                                                                                                                           | Al <sub>2</sub> O <sub>3</sub>                    | undissociated<br>HCOOH                                | 18, 26, 27  |
| <b>Bands resulting from subsequent adsorption of CH<sub>3</sub>(CH<sub>2</sub>)<sub>4</sub>NH<sub>2</sub> (spectra reported as grey lines)</b> |                                                   |                                                       |             |
| 1665, 1634                                                                                                                                     | TiO <sub>2</sub> _P25                             |                                                       |             |
| 1674, 1636                                                                                                                                     | ZrO <sub>2</sub>                                  |                                                       |             |
| 1665, 1643                                                                                                                                     | TiO <sub>2</sub> _Merck                           | $\nu\text{C=O}$ (amide)                               | 18, 28      |
| 1666, 1629                                                                                                                                     | CeO <sub>2</sub>                                  |                                                       |             |
| 1653                                                                                                                                           | Al <sub>2</sub> O <sub>3</sub>                    |                                                       |             |
| 1589                                                                                                                                           | TiO <sub>2</sub> _P25                             |                                                       |             |
| 1573                                                                                                                                           | ZrO <sub>2</sub> , CeO <sub>2</sub>               |                                                       |             |
| 1598                                                                                                                                           | TiO <sub>2</sub> _Merck                           | $\nu_{\text{asym}}\text{COO}^-$ , $\delta\text{NH}_2$ | 18, 26, 28  |
| 1603, 1528                                                                                                                                     | Al <sub>2</sub> O <sub>3</sub>                    |                                                       |             |
| 1469, 1444                                                                                                                                     | TiO <sub>2</sub> _P25                             |                                                       |             |
| 1466, 1447                                                                                                                                     | ZrO <sub>2</sub> ,                                |                                                       |             |
| 1466, 1441                                                                                                                                     | TiO <sub>2</sub> _Merck                           | $\delta\text{CH}_2$ , $\delta\text{CH}_3$             | 28          |
| 1464                                                                                                                                           | CeO <sub>2</sub>                                  |                                                       |             |
| 1469                                                                                                                                           | Al <sub>2</sub> O <sub>3</sub>                    |                                                       |             |
| 1361,                                                                                                                                          | TiO <sub>2</sub> _P25                             |                                                       |             |
| 1370-1316                                                                                                                                      | ZrO <sub>2</sub>                                  |                                                       |             |
| 1386, 1364                                                                                                                                     | TiO <sub>2</sub> _Merck                           | $\nu_{\text{sym}}\text{COO}^-$                        | 18, 26      |
| 1375                                                                                                                                           | CeO <sub>2</sub>                                  |                                                       |             |
| 1383, 1300                                                                                                                                     | Al <sub>2</sub> O <sub>3</sub>                    |                                                       |             |

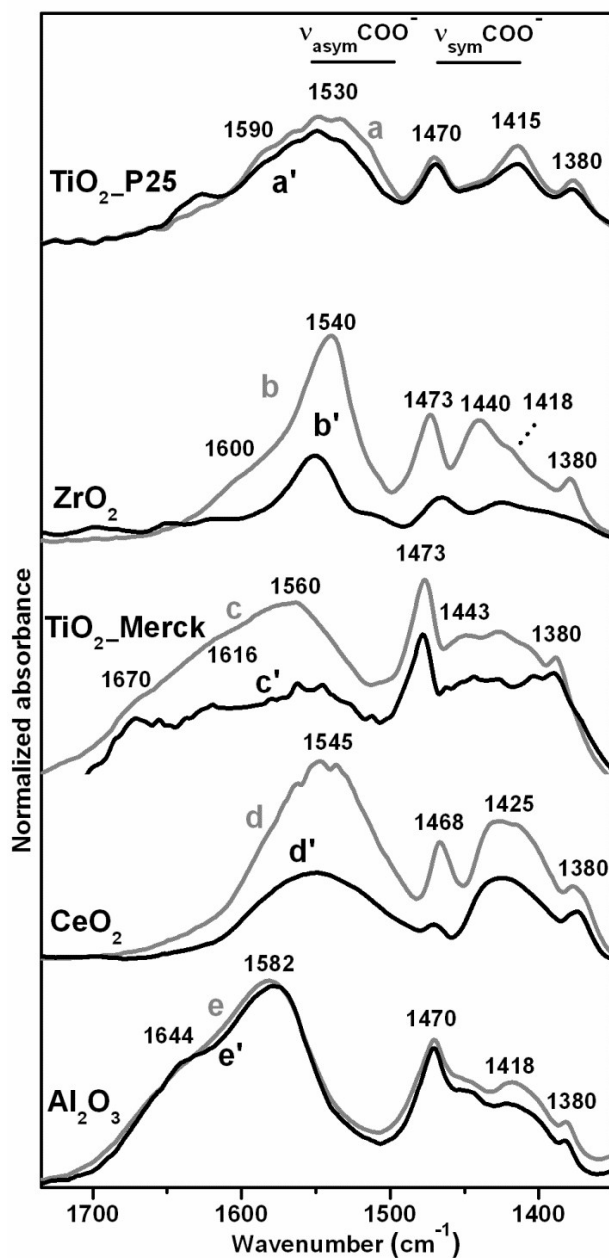

**Figure S1.** IR spectra of  $\text{TiO}_2$ \_P25,  $\text{ZrO}_2$ ,  $\text{TiO}_2$ \_Merck,  $\text{CeO}_2$ , and  $\gamma\text{-Al}_2\text{O}_3$  contacted with propanoic acid and 1-pentanamine, outgassed at r.t. (grey lines: a, b, c, d, e) and further heated in static atmosphere at 383K for 30 min (black lines: a', b', c', d', e').

**Table S3.** Integrated intensities of  $\nu_{\text{asym}}\text{COO}^-$  and  $\nu_{\text{sym}}\text{COO}^-$  components of HCOOH adsorbed on  $\text{TiO}_2\text{-P25}$  and  $\text{TiO}_2\text{-Merck}$  (see Figure 5 in the main text).

| <i>Material</i>              | $\nu_{\text{asym}}(\text{COO}^-)$ ,<br><i>cm<sup>-1</sup></i> | <i>Integrated Intensity, cm<sup>-1</sup></i> | $\nu_{\text{sym}}(\text{COO}^-)$ ,<br><i>cm<sup>-1</sup></i> | <i>Integrated Intensity, cm<sup>-1</sup></i> |
|------------------------------|---------------------------------------------------------------|----------------------------------------------|--------------------------------------------------------------|----------------------------------------------|
| <b>TiO<sub>2</sub>_P25</b>   | 1519                                                          | 5.43                                         | 1361                                                         | 10.19                                        |
|                              | 1541                                                          | 8.60                                         | 1412                                                         | 0.28                                         |
|                              | 1560                                                          | 4.35                                         |                                                              |                                              |
|                              | 1579                                                          | 11.53                                        |                                                              |                                              |
|                              | 1615                                                          | 5.98                                         |                                                              |                                              |
| <b>TiO<sub>2</sub>_Merck</b> | 1598                                                          | 29.74                                        | 1364                                                         | 3.90                                         |
|                              | 1674                                                          | 12.50                                        | 1403                                                         | 2.07                                         |

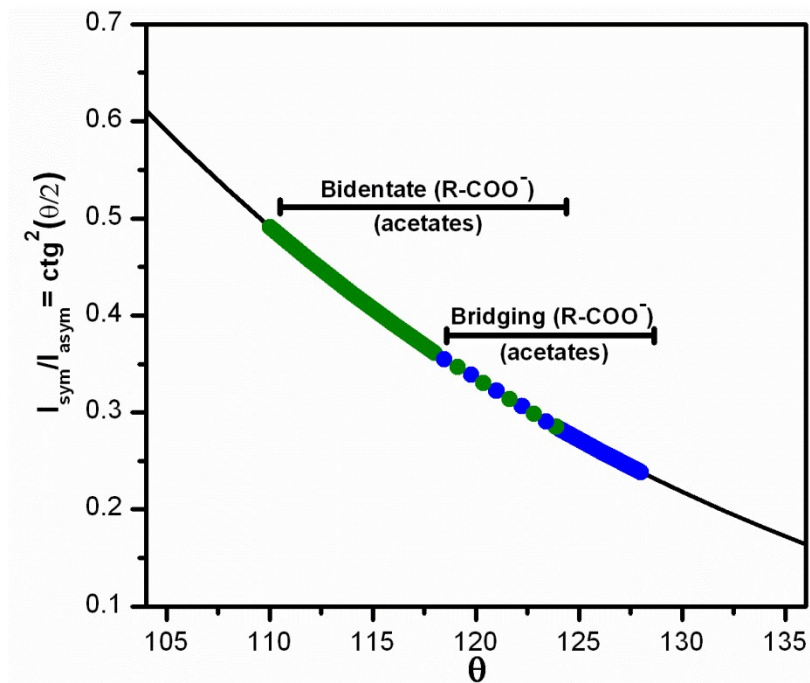

**Figure S2.** Dependence of integrated intensities ratio of  $I(\text{COO}_{\text{sym}})/I(\text{COO}_{\text{asym}})$  from the O-C-O bond angle of adsorbed  $\text{COO}^-$  species (in green and blue are ranges of angles measured for bidentate and bridging type of carboxylate complexes respectively). [Ref: G.B. Deacon, R.J. Phillips, *Coord. Chem. Rev.*, 1980, 33, 227]
